# Supplementary material
Source: PubMed Central journal article supplement (PMC5740314)
Supplement: AAC.01710-17_zac001186777s1.pdf [file AAC.01710-17_zac001186777s1.pdf]

**Supplement Table 1:** Fitted TFV-DP median values (fmol/punch) from base model with no covariates or washout

| Week     | 2   | 4    | 6    | 8    | 10   | 12   |
|----------|-----|------|------|------|------|------|
| Doses/wk |     |      |      |      |      |      |
| 2/7      | 197 | 358  | 358  | 430  | 499  | 472  |
| 1/3      | 218 | 386  | 406  | 482  | 548  | 520  |
| 4/7      | 348 | 560  | 704  | 805  | 844  | 820  |
| 2/3      | 409 | 645  | 839  | 952  | 985  | 963  |
| 7/7      | 653 | 1030 | 1281 | 1464 | 1557 | 1550 |

**Supplement Table 2.**

Fitted 10<sup>th</sup> and 90<sup>th</sup> percentiles for TFV-DP at steady state for 2, 4, and 7 doses/wk according to pre-specified predictors.

| MODEL             | 28.6%<br>(2 DOSES/WK) | 57.1%<br>(4 DOSES/WK) | 100%<br>(7 DOSES/WK) |
|-------------------|-----------------------|-----------------------|----------------------|
| BASE              | 295, 586              | 607, 1207             | 1088, 2162           |
| WOMEN             | 329, 627              | 680, 1295             | 1221, 2326           |
| MEN               | 272, 517              | 561, 1068             | 1007, 1917           |
| DENVER            | 316, 618              | 651, 1276             | 1169, 2290           |
| SAN FRANCISCO     | 278, 545              | 574, 1125             | 1031, 2020           |
| CAUCASIANS        | 309, 608              | 637, 1255             | 1143, 2252           |
| HISPANICS         | 297, 584              | 612, 1206             | 1098, 2164           |
| AFRICAN AMERICANS | 265, 522              | 547, 1078             | 982, 1935            |
